# Supplementary material for: Even moderate geomagnetic pulsations can cause fluctuations of fo F2 frequency of the auroral ionosphere
Source: Copernicus journal article supplement (doi:10.5194/angeo-39-549-2021), 2021-06-16
Supplement: Supplementary file 1 [file angeo-39-549-2021-supplement.zip]

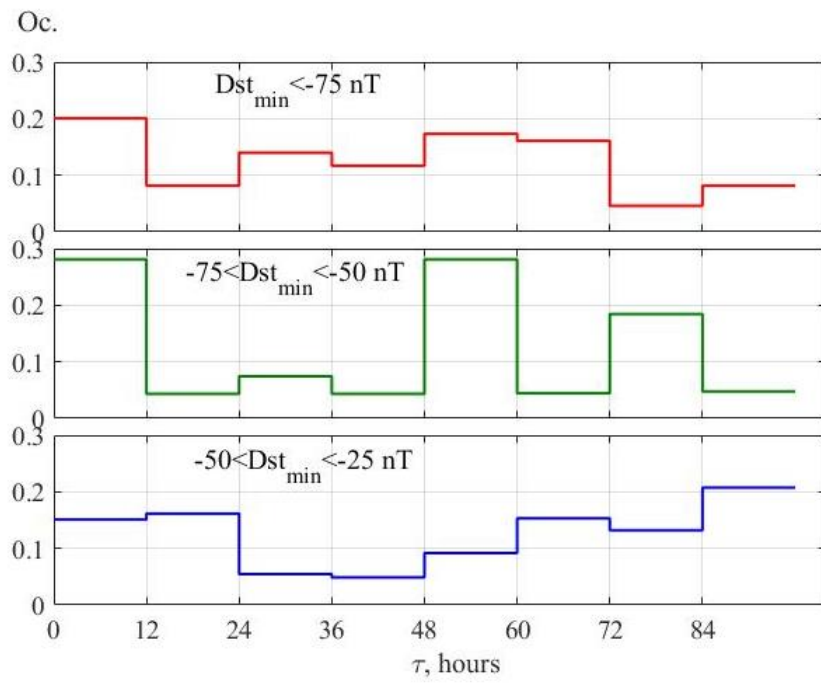

Figure S1. Distribution over time shift between  $t(Dst_{min})$  and group 3 intervals for 3 levels of  $Dst_{min}$
