# Supplementary material for: Even moderate geomagnetic pulsations can cause fluctuations of fo F2 frequency of the auroral ionosphere
Source: Copernicus journal article supplement (doi:10.5194/angeo-39-549-2021), 2021-06-16
Supplement: Supplementary file 2 [file angeo-39-549-2021-supplement.zip]

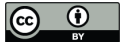

## *Supplement of*

# **Even moderate geomagnetic pulsations can cause fluctuations of $f_oF2$ frequency of the auroral ionosphere**

**Nadezda Yagova et al.**

*Correspondence to:* Nadezda Yagova ([nyagova@ifz.ru](mailto:nyagova@ifz.ru))

- [angeo-39-549-2021-supplement-title-page.pdf](#)

- 2014

- [SOD-2014-055-foF2.jpeg](#)
- [SOD-2014-101-foF2.jpeg](#)
- [SOD-2014-144-foF2.jpeg](#)
- [SOD-2014-159-foF2.jpeg](#)
- [SOD-2014-172-foF2.jpeg](#)
- [SOD-2014-230-foF2.jpeg](#)
- [SOD-2014-256-foF2.jpeg](#)
- [SOD-2014-257-foF2.jpeg](#)
- [SOD-2014-258-foF2.jpeg](#)
- [SOD-2014-259-foF2.jpeg](#)
- [SOD-2014-268-foF2.jpeg](#)
- [SOD-2014-288-foF2.jpeg](#)
- [SOD-2014-292-foF2.jpeg](#)
- [SOD-2014-297-foF2.jpeg](#)
- [SOD-2014-304-foF2.jpeg](#)
- [SOD-2014-310-foF2.jpeg](#)
- [SOD-2014-311-foF2.jpeg](#)
- [SOD-2014-312-foF2.jpeg](#)
- [SOD-2014-314-foF2.jpeg](#)
- [SOD-2014-315-foF2.jpeg](#)
- [SOD-2014-316-foF2.jpeg](#)
- [SOD-2014-341-foF2.jpeg](#)
- [SOD-2014-344-foF2.jpeg](#)

- SOD-2014-347-foF2.jpeg
- SOD-2014-361-foF2.jpeg
- SOD-2014-363-foF2.jpeg
- sod-2014-055-foF2.txt
- sod-2014-101-foF2.txt
- sod-2014-102-foF2.txt
- sod-2014-144-foF2.txt
- sod-2014-159-foF2.txt
- sod-2014-172-foF2.txt
- sod-2014-230-foF2.txt
- sod-2014-256-foF2.txt
- sod-2014-257-foF2.txt
- sod-2014-258-foF2.txt
- sod-2014-259-foF2.txt
- sod-2014-268-foF2.txt
- sod-2014-288-foF2.txt
- sod-2014-292-foF2.txt
- sod-2014-297-foF2.txt
- sod-2014-304-foF2.txt
- sod-2014-310-foF2.txt
- sod-2014-311-foF2.txt
- sod-2014-312-foF2.txt
- sod-2014-314-foF2.txt
- sod-2014-315-foF2.txt
- sod-2014-316-foF2.txt
- sod-2014-341-foF2.txt
- sod-2014-344-foF2.txt
- sod-2014-347-foF2.txt
- sod-2014-361-foF2.txt
- sod-2014-363-foF2.txt

- 2015

- SOD-2015-003-foF2.jpeg
- SOD-2015-022-foF2.jpeg
- SOD-2015-030-foF2.jpeg
- SOD-2015-046-foF2.jpeg
- SOD-2015-067-foF2.jpeg
- SOD-2015-069-foF2.jpeg
- SOD-2015-070-foF2.jpeg
- SOD-2015-094-foF2.jpeg
- SOD-2015-134-foF2.jpeg
- SOD-2015-135-foF2.jpeg

- SOD-2015-139-foF2.jpeg
- SOD-2015-140-foF2.jpeg
- SOD-2015-163-foF2.jpeg
- SOD-2015-181-foF2.jpeg
- SOD-2015-192-foF2.jpeg
- SOD-2015-193-foF2.jpeg
- SOD-2015-196-foF2.jpeg
- SOD-2015-202-foF2.jpeg
- SOD-2015-251-foF2.jpeg
- SOD-2015-259-foF2.jpeg
- SOD-2015-265-foF2.jpeg
- SOD-2015-266-foF2.jpeg
- SOD-2015-359-foF2.jpeg
- sod-2015-003-foF2.txt
- sod-2015-022-foF2.txt
- sod-2015-030-foF2.txt
- sod-2015-046-foF2.txt
- sod-2015-067-foF2.txt
- sod-2015-069-foF2.txt
- sod-2015-070-foF2.txt
- sod-2015-081-foF2.txt
- sod-2015-094-foF2.txt
- sod-2015-134-foF2.txt
- sod-2015-135-foF2.txt
- sod-2015-139-foF2.txt
- sod-2015-140-foF2.txt
- sod-2015-157-foF2.txt
- sod-2015-163-foF2.txt
- sod-2015-181-foF2.txt
- sod-2015-192-foF2.txt
- sod-2015-193-foF2.txt
- sod-2015-196-foF2.txt
- sod-2015-202-foF2.txt
- sod-2015-251-foF2.txt
- sod-2015-259-foF2.txt
- sod-2015-265-foF2.txt
- sod-2015-266-foF2.txt
- sod-2015-359-foF2.txt

- Figure\_S1.pdf

- appr

- appr\_readme.txt

- fr\_crit\_2014\_055\_lor\_appr.txt
- fr\_crit\_2014\_101\_lor\_appr.txt
- fr\_crit\_2014\_102\_lor\_appr.txt
- fr\_crit\_2014\_144\_lor\_appr.txt
- fr\_crit\_2014\_159\_lor\_appr.txt
- fr\_crit\_2014\_172\_lor\_appr.txt
- fr\_crit\_2014\_230\_lor\_appr.txt
- fr\_crit\_2014\_256\_lor\_appr.txt
- fr\_crit\_2014\_257\_lor\_appr.txt
- fr\_crit\_2014\_258\_lor\_appr.txt
- fr\_crit\_2014\_259\_lor\_appr.txt
- fr\_crit\_2014\_268\_lor\_appr.txt
- fr\_crit\_2014\_288\_lor\_appr.txt
- fr\_crit\_2014\_292\_lor\_appr.txt
- fr\_crit\_2014\_297\_lor\_appr.txt
- fr\_crit\_2014\_304\_lor\_appr.txt
- fr\_crit\_2014\_310\_lor\_appr.txt
- fr\_crit\_2014\_311\_lor\_appr.txt
- fr\_crit\_2014\_312\_lor\_appr.txt
- fr\_crit\_2014\_314\_lor\_appr.txt
- fr\_crit\_2014\_315\_lor\_appr.txt
- fr\_crit\_2014\_316\_lor\_appr.txt
- fr\_crit\_2014\_341\_lor\_appr.txt
- fr\_crit\_2014\_344\_lor\_appr.txt
- fr\_crit\_2014\_347\_lor\_appr.txt
- fr\_crit\_2014\_361\_lor\_appr.txt
- fr\_crit\_2014\_363\_lor\_appr.txt
- fr\_crit\_2015\_003\_lor\_appr.txt
- fr\_crit\_2015\_022\_lor\_appr.txt
- fr\_crit\_2015\_030\_lor\_appr.txt
- fr\_crit\_2015\_046\_lor\_appr.txt
- fr\_crit\_2015\_067\_lor\_appr.txt
- fr\_crit\_2015\_069\_lor\_appr.txt
- fr\_crit\_2015\_070\_lor\_appr.txt
- fr\_crit\_2015\_081\_lor\_appr.txt
- fr\_crit\_2015\_094\_lor\_appr.txt
- fr\_crit\_2015\_134\_lor\_appr.txt
- fr\_crit\_2015\_135\_lor\_appr.txt
- fr\_crit\_2015\_139\_lor\_appr.txt
- fr\_crit\_2015\_140\_lor\_appr.txt
- fr\_crit\_2015\_157\_lor\_appr.txt
- fr\_crit\_2015\_163\_lor\_appr.txt

- fr\_crit\_2015\_181\_lor\_appr.txt
- fr\_crit\_2015\_192\_lor\_appr.txt
- fr\_crit\_2015\_193\_lor\_appr.txt
- fr\_crit\_2015\_196\_lor\_appr.txt
- fr\_crit\_2015\_202\_lor\_appr.txt
- fr\_crit\_2015\_251\_lor\_appr.txt
- fr\_crit\_2015\_259\_lor\_appr.txt
- fr\_crit\_2015\_265\_lor\_appr.txt
- fr\_crit\_2015\_266\_lor\_appr.txt
- fr\_crit\_2015\_359\_lor\_appr.txt

The copyright of individual parts of the supplement might differ from the article licence.
